# Supplementary material for: Cumulative Incidence of All-Cause Knee Injury, Concussion, and Stress Fracture among Transgender Patients on Gender-Affirming Hormone Therapy: An Exploratory Retrospective Cohort Study
Source: MDPI journal article supplement (doi:10.3390/ijerph20227060), 2023-11-13
Supplement: s1 [file s1]

Supplemental Materials

**Table S1: Included Musculoskeletal Injuries Diagnosis at Encounter**

| <b>Musculoskeletal Injury</b> | <b>ICD Code (Category Codes)<sup>a</sup></b>                                                                                                                                           |
|-------------------------------|----------------------------------------------------------------------------------------------------------------------------------------------------------------------------------------|
| <b>Knee</b>                   | 719.06<br>719.46<br>844.9<br>848.9<br>959.7<br>M23.8X<br>R93.6<br>S83.511A<br>S83.511D<br>S83.512A<br>S89.80XA<br>S89.90XA<br>S89.90XD<br>S89.91XA<br>S89.91XD<br>S89.92XA<br>S89.92XS |
| <b>Concussion</b>             | 850.0<br>850.11<br>850.5<br>850.9<br>S06.0X9A                                                                                                                                          |
| <b>Stress Fracture</b>        | 733.94<br>733.95<br>805.4<br>M84.352A<br>M84.361D<br>M84.375A<br>M84.371A; M84.374A; M84.374D; M84.374G; M84.377G;<br>M84.378G; Z87.312                                                |

ICD: International Classification of Diseases

ICD codes were checked for exclusions (Category codes) *Z98.890, Z87.828, Z47.89, F07.81, T84.XA*.
